# Supplementary material for: Karlseifertite, Pb(Ga2Ge)(AsO4)2(OH)6, a new dussertite-group mineral, from Tsumeb, Namibia
Source: Copernicus journal article supplement (doi:10.5194/ejm-36-873-2024), 2024-09-24
Supplement: Supplementary file 1 [file ejm-36-873-2024-supplement.zip]

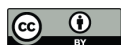

*Supplement of*

**Karlseifertite,  $\text{Pb}(\text{Ga}_2\text{Ge})(\text{AsO}_4)_2(\text{OH})_6$ , a new dussertite-group mineral,  
from Tsumeb, Namibia**

**Anthony R. Kampf et al.**

*Correspondence to:* Anthony R. Kampf (akampf@nhm.org)

- ejm-36-873-2024-supplement-title-page.pdf
- KARLSEIFERTITE.cif

The copyright of individual parts of the supplement might differ from the article licence.
